# Supplementary material for: Facile synthesis of laccase mimic Cu/H3BTC MOF for efficient dye degradation and detection of phenolic pollutants
Source: Royal Society of Chemistry journal article supplement (doi:10.1039/c9ra07473b), 2019-01-01
Supplement: c9ra07473b1.pdf [file c9ra07473b1.pdf]

## Supporting Information

### Facile Synthesis of Laccase Mimic Cu-BTC MOF for Efficient Dye Degradation and Detection of Phenolic Pollutants

Saira Shams, Waqas Ahmad, Amjad Hussain Memon, Yun Wei, Qipeng Yuan, Hao Liang\*

State Key Laboratory of Chemical Resource Engineering, Beijing University of Chemical  
Technology, Beijing, P. R. China

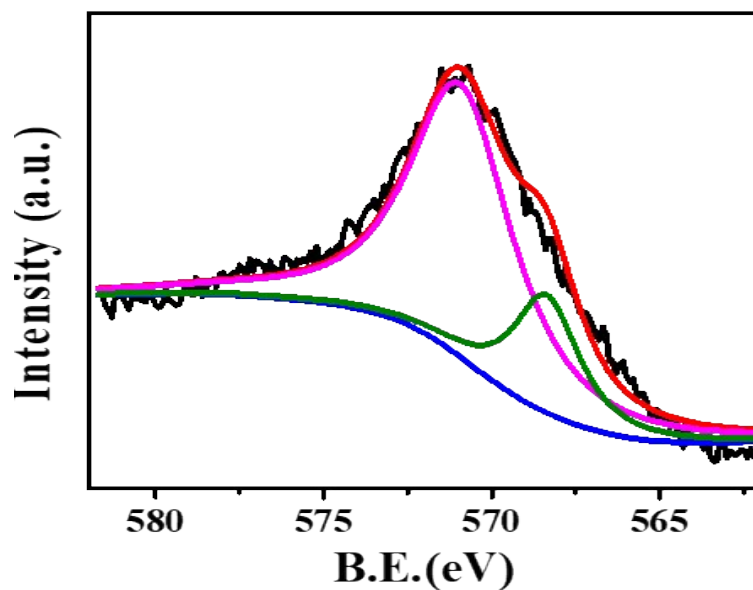

**Fig. S1** Cu LMM Auger spectra of Cu/H3BTC. There are two peak fittings observed in the Auger Cu LMM spectra. The peak fitting at 572.9 eV were used to conform the existence of Cu<sup>+</sup> and the other peak fitting at 568.2 were attributed to Cu<sup>2+</sup>.

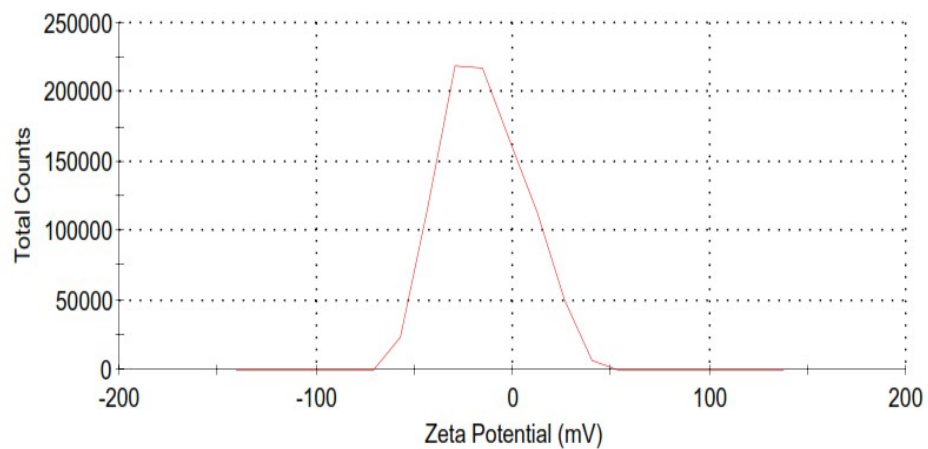

**Fig. S2** Zeta Potential of Cu/H3BTC MOF.

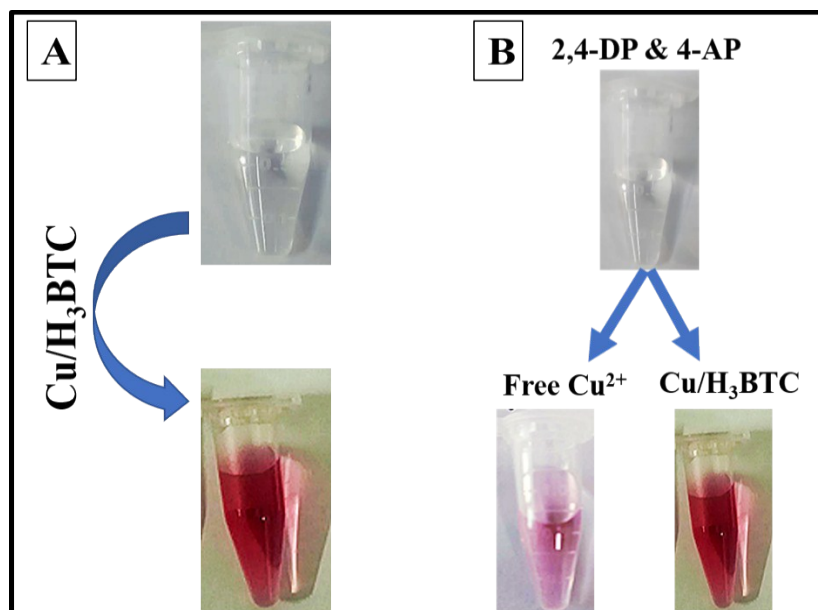

**Fig. S3** (A) Reaction of 2,4-DP and 4-AP catalyzed by Cu/H3BTC (B) Control test comparing free Cu<sup>2+</sup> and its mixture with H<sub>3</sub>BTC for laccase like activity in water.

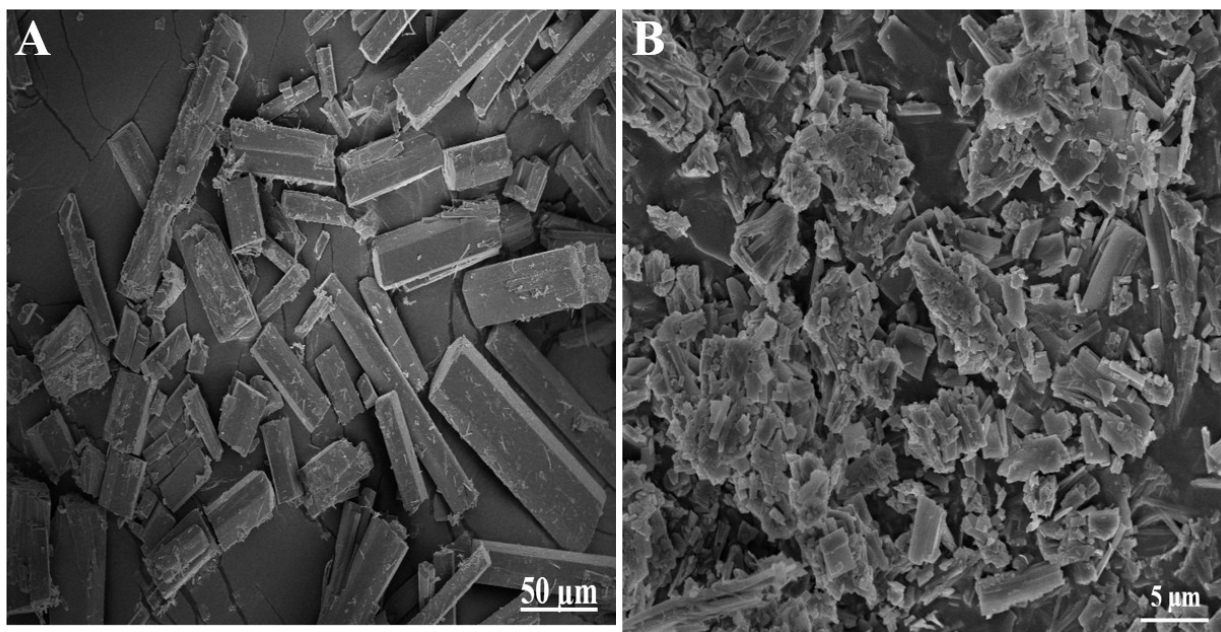

**Fig. S4** (A) SEM images of Cu/H<sub>3</sub>BTC (A) Before AB-10B dye degradation (B) After ten (10) successive cycles of degradation

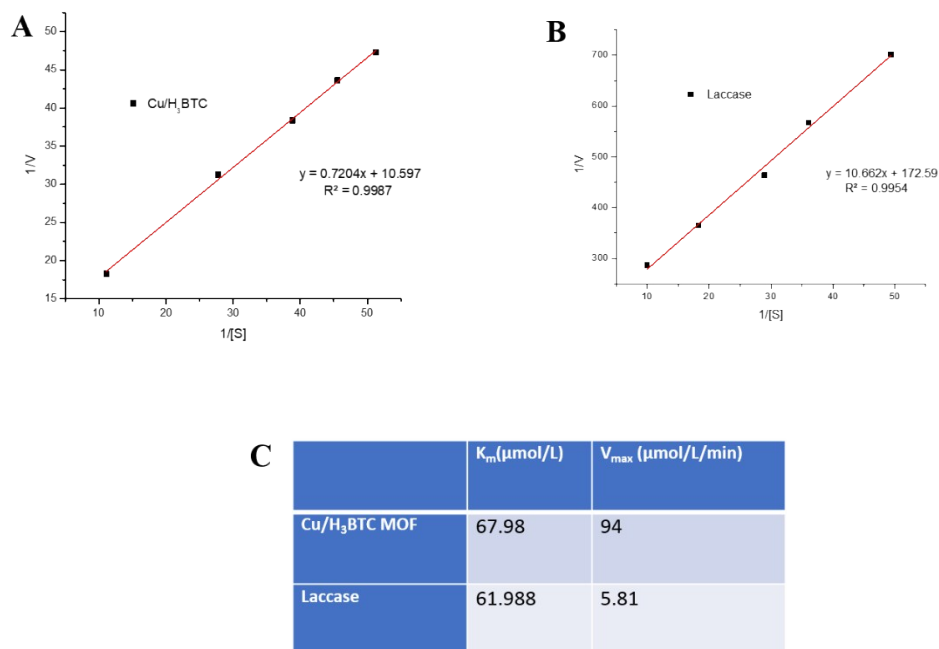

**Fig. S5** The Lineweaver-Burk curve of (A) Cu/H<sub>3</sub>BTC and (B) laccase for oxidizing epinephrine in MES buffer solution (50 mM, pH 6.8) at room temperature. (C) The kinetic parameters for Cu/H<sub>3</sub>BTC and laccase.

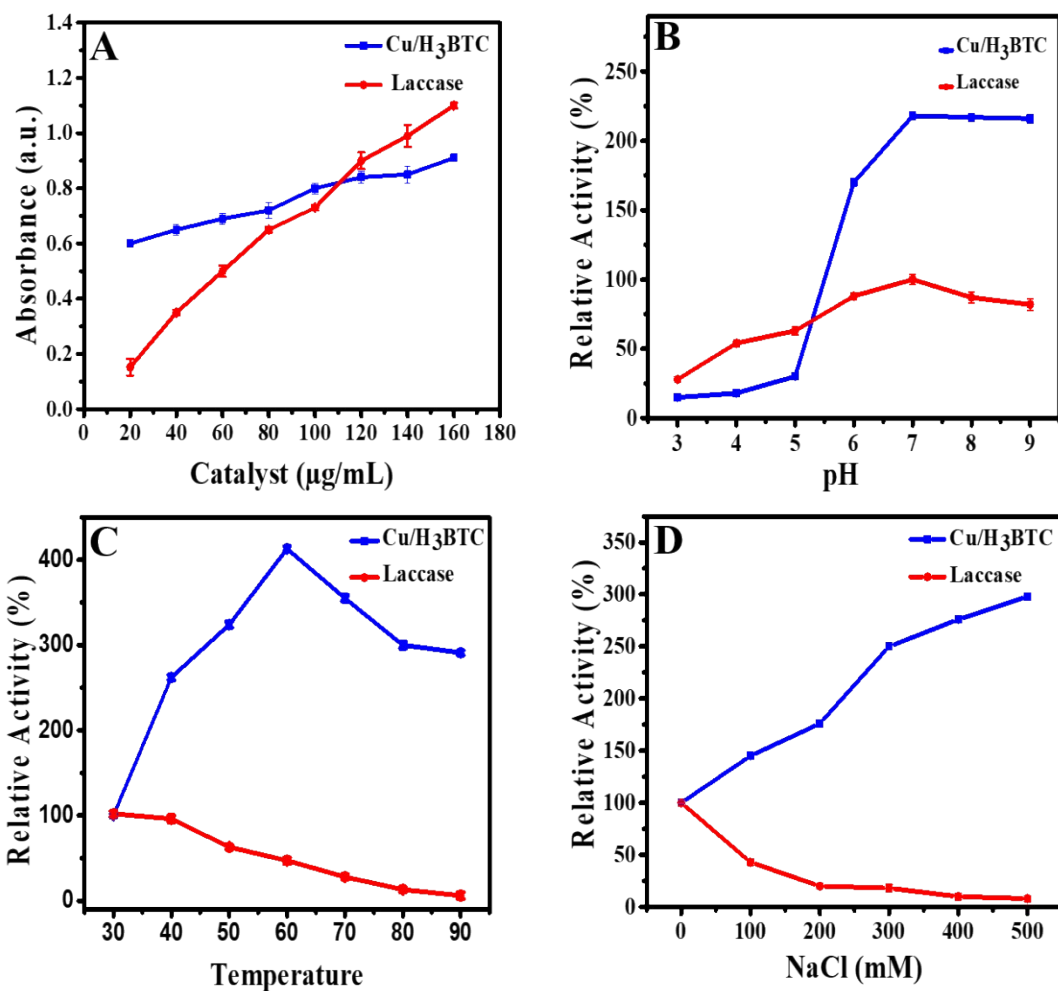

**Fig. S6** (A) Comparability the catalysis efficiency of Cu/H<sub>3</sub>BTC and laccase as a function of enzyme concentration. Constancy of Cu/H<sub>3</sub>BTC comparison with same laccase concentration at various (B) pH (C) temperature and (D) NaCl concentration.
